# Supplementary material for: A Short Cost-Effective Methodology for Tracing the Temporal and Spatial Anthropogenic Inputs of Micropollutants into Ecosystems: Verified Mass-Balance Approach Applied to River Confluence and WWTP Release
Source: MDPI journal article supplement (doi:10.3390/w14244100), 2022-12-15
Supplement: s1 [file s1]

**A short cost-effective methodology for tracing the temporal and spatial anthropogenic inputs  
of micropollutants to ecosystems: verified mass balance approach applied to rivers confluence  
and WWTP release**

**Hawraa Ayoub<sup>1</sup>, Olivier Potier<sup>1,\*</sup>, Bachar Koubaissy<sup>2</sup>, Steve Pontvianne<sup>1</sup>, Audrey Lenouvel<sup>3</sup>, Cédric Guignard<sup>3</sup>, Hélène Poirot<sup>1</sup>, Joumana Toufaily<sup>2</sup>, Tayssir Hamieh<sup>2,4</sup> and Thibault Roques-Carmes<sup>1</sup>**

Table S1.The first watch list of the 10 compounds created in the Decision 2015/495/EU.

| Name of substance/group of substances |                                  | Concentration (ng/L)/ Matrix/ Location                                                                                                                                                                                            |
|---------------------------------------|----------------------------------|-----------------------------------------------------------------------------------------------------------------------------------------------------------------------------------------------------------------------------------|
| 17-Alphaethinylestradiol (EE2)        | 17-Alphaethinylestradiol (EE2)   | <1-8/ WW/ Korea (n = 120), Germany (n.a.), South Africa (n = 12)<br>0.2-1.9/ SW/ China (n = 3), Korea (n = 120), Germany (n.a.), France (n = 73)<br>0.5-230/ GW/ France (n = 73), USA (n.a.)                                      |
| Natural hormones                      | 17-Beta-estradiol (E2)           | <1-88/ WW/ China (n = 3), Korea (n = 120), Sweden (n = 3),UK (n.a.), Germany (n.a.)<br>0.2-10.1/ SW/ China (n = 3), Korea (n = 120), Germany (n.a.), Japan (n = 517), France (n = 71)<br>0.3-147/ GW/ France (n = 73), USA (n.a.) |
|                                       | Estrone (E1)                     | WW/ China (n = 3), Korea (n = 120), Sweden (n = 3), UK (n.a.), Germany (n.a.)<br>0.5-69.1/ SW/ China (n = 3), Korea (n = 120), Germany (n.a.),France (n = 71)<br>0.7-79/ GW/ France (n = 73), USA (n.a.)                          |
| Diclofenac                            | Diclofenac                       | 14.9-4425/ WW/ Spain (n.a.), Italy (n = 3), USA (n.a.), Portugal (n = 4)<br>0.8-1043/ SW/ Spain (n.a.), Vietnam (n.a), Costa Rica (n = 86),Greece (n = 30)<br>1.17-380/ GW/ Spain (n = 30), France (n = 70)                       |
| 2,6-di-tert-butyl-4-methylphenol      | 2,6-di-tert-butyl-4-Methylphenol | 49-620/ SW/ USA (n = 19), Sweden (n.a.)                                                                                                                                                                                           |
| 2-ethylhexyl-4-methoxycinnamate       | 2-ethylhexyl-4-methoxycinnamate  | 4.7-505/ WW/ China (n = 17), Norway (n = 5)<br>12-1040/ SW/ Japan (n = 23)<br>770/ GW/ Spain (n = 7)                                                                                                                              |
| Macrolide antibiotics                 | Azithromycin                     | 0.4-1220/ WW/ Italy (n = 3), Slovakia (n = 3), USA (n.a.), Portugal (n = 4)<br>0.6-90.8/ SW/ Vietnam (n = 2), China (n = 24)<br>0.6-1620/ GW/ Spain (n.a), China (n = 69)                                                         |
|                                       | Clarithromycin                   | 54-1890/ WW/ Spain (n.a.), Italy (n = 3), Slovakia (n = 3), USA (n.a)<br>0.01-778/ SW/ Vietnam (n = 2), Spain (n = 18), China (n = 24)<br>0.2-20.5/ GW/ Spain (n.a.), China (n = 15)                                              |
|                                       | Erythromycin                     | 16-147.9/ WW/ Spain (n.a.), Slovakia (n = 3), USA (n.a.), China(n = 3)<br>0.28-2246/ SW/ Vietnam (n = 2), Spain (n = 18)<br>4.8-154.3/ GW/ Spain (n = 121), China (n = 54)                                                        |
| Methiocarb                            |                                  | 4.73-14.92/ WW/ Spain (n = 55)                                                                                                                                                                                                    |
| Neonicotinoids                        | Imidacloprid                     | 2-34.44/ WW/ Spain (n = 55)<br>1.1-105/ SW/ Spain (n = 24), USA (n = 35), Greece (n = 89), Portugal (n.a.), Australia (n = 13)                                                                                                    |
|                                       |                                  |                                                                                                                                                                                                                                   |

|           |              |                                                                 |
|-----------|--------------|-----------------------------------------------------------------|
|           | Thiacloprid  | 20-400/ SW/ Australia (n = 13)                                  |
|           | Thiamethoxam | 0-1580/ SW/ Brasil (n.a.), Vietnam (n ¼=11), Australia (n = 13) |
|           | Clothianidin | 20-420/ SW/ Australia (n = 13)                                  |
|           | Acetamiprid  | 20-380/ SW/ Australia (n = 13)                                  |
| Oxadiazon |              | 4-1440/ SW/ Canada (n = 8)                                      |
| Triallate |              | n.a.                                                            |

n.a.: not available

WW: wastewater, SW: surface water, GW: ground water

Table S2. Weather conditions during the four sampling periods.

| Conditions          | Sampling 1        | Sampling 2     | Sampling 3      | Sampling 4    |
|---------------------|-------------------|----------------|-----------------|---------------|
| Date                | 11 September 2015 | 5 January 2016 | 14 October 2016 | 17 March 2017 |
| Weather             | Sunny             | Rainy          | Cloudy          | Clear         |
| Weather days before | Sunny             | No rain, cold  | Some rain       | Clear         |
| Temperature         | 22 °C             | 7 °C           | 8 °C            | 11 °C         |

Table S3. Parameters of the LC-MS/MS instrument, including mobile phases and eluent programs. The notation “min” corresponds to minutes.

|                     | Positive ionization mode                                                                                    | Negative ionisation mode                                                                                                 |
|---------------------|-------------------------------------------------------------------------------------------------------------|--------------------------------------------------------------------------------------------------------------------------|
| Column              | Zorbax Eclipse Plus C18 (Agilent)                                                                           |                                                                                                                          |
| Oven temperature    | 40 °C                                                                                                       |                                                                                                                          |
| Flow                | 0.25 mL/min                                                                                                 |                                                                                                                          |
| Volume of injection | 25 µL                                                                                                       |                                                                                                                          |
| Eluents             | A: Water + 0.1 % formic acid<br>B: Methanol + 0.1 % formic acid                                             | A: Water + 2.5 mM ammonium acetate<br>B: Acetonitrile                                                                    |
| Eluent program      | 0 min 10 % B – 2 min 10 % B – 10 min 30 % B – 14 min 95 % B – 16 min 95 % B – 17 min 10 % B – 28 min 10 % B | 0 min 30 % B – 1 min 30 % B – 3 min 50 % B – 8 min 80 % B – 9 min 95 % B – 11 min 95 % B – 12 min 30 % B – 15 min 30 % B |

Table S4. The Concentrations (C) in ng/L and mass fluxes (F) in g/day for the 21 micropollutants in 5 sampling sites on 3 sampling dates.

| Compound                    | Value    | A3   | A2   | A1   | B2   | B1   |
|-----------------------------|----------|------|------|------|------|------|
| September 2015              | Q (m³/s) | 13.5 | 5.4  | 3.9  | 8.08 | 8.08 |
| Bisphenol A                 | F        | 155  | 15   | 15   | 165  | 48   |
|                             | C        | 133  | 31.7 | 44.3 | 236  | 69.1 |
| Estradiol-beta              | F        | -    | -    | -    | -    | -    |
|                             | C        | n.q  | n.q  | n.q  | n.q  | n.q  |
| Estrone                     | F        | -    | -    | -    | -    | -    |
|                             | C        | n.q  | n.q  | n.q  | n.q  | n.q  |
| Ethinylestradiol            | F        | -    | -    | -    | -    | -    |
|                             | C        | n.q  | n.q  | n.q  | n.q  | n.q  |
| Carbamazepine               | F        | 58   | 10   | 8    | 38   | 15   |
|                             | C        | 49.2 | 21   | 23.1 | 54.1 | 21.8 |
| Carbamazepine-10,11-epoxide | F        | -    | -    | -    | -    | -    |
|                             | C        | n.q  | n.q  | n.q  | 2.99 | n.q  |
| Clarithromycin              | F        | 97   | -    | -    | 103  | 19   |
|                             | C        | 83.5 | n.q  | n.q  | 148  | 27.3 |
| Cyclophosphamide            | F        | -    | -    | -    | -    | -    |
|                             | C        | n.q  | n.q  | n.q  | 2.04 | n.q  |
| Diclofenac                  | F        | 33   | -    | 2    | 61   | 5    |
|                             | C        | 28.6 | n.q  | 7.06 | 87.4 | 6.86 |
| Erythromycin                | F        | -    | -    | -    | -    | -    |
|                             | C        | n.q  | n.q  | n.q  | n.q  | n.q  |
| Ibuprofen                   | F        | 9    | 2    | 2    | 7    | 6    |
|                             | C        | 7.63 | 5    | 5.7  | 9.33 | 8.18 |
| Ketoprofen                  | F        | -    | -    | -    | 12   | -    |
|                             | C        | n.q  | n.q  | n.q  | 16.9 | n.q  |
| Lidocaine                   | F        | 44   | 12   | 14   | 40   | 13   |
|                             | C        | 37.4 | 25.6 | 41   | 57.2 | 18.3 |
| Naproxen                    | F        | 19   | -    | -    | 21   | 11   |
|                             | C        | 16.4 | n.q  | n.q  | 29.6 | 15.2 |
| Sulfadimethoxine            | F        | -    | -    | -    | -    | -    |
|                             | C        | n.q  | n.q  | n.q  | n.q  | n.q  |
| Sulfadimidine               | F        | -    | -    | -    | -    | -    |
|                             | C        | n.q  | n.q  | n.q  | n.q  | n.q  |
| Sulfamethoxazole            | F        | 52   | 4    | 2    | 45   | 11   |
|                             | C        | 44.6 | 8.96 | 6.63 | 64.6 | 15.8 |
| Sulfathiazole               | F        | -    | -    | -    | -    | -    |
|                             | C        | n.q  | n.q  | n.q  | n.q  | n.q  |
| Triclosan                   | F        | -    | -    | -    | -    | -    |
|                             | C        | n.q  | n.q  | n.q  | n.q  | n.q  |
| PFOA                        | F        | -    | -    | -    | -    | -    |
|                             | C        | n.q  | 8.52 | n.q  | n.q  | n.q  |
| PFOS                        | F        | 19   | 7    | 7    | 10   | 9    |
|                             | C        | 15.9 | 16   | 21.9 | 14.1 | 12.3 |
| Compound                    | Value    | A3   | A2   | A1   | B2   | B1   |
| January 2016                | Q (m³/s) | 124  | 90.5 | 58.5 | 30.3 | 30.3 |
| Bisphenol A                 | F        | 435  | 366  | 246  | 241  | 117  |

|                             |   |      |      |      |      |      |
|-----------------------------|---|------|------|------|------|------|
|                             | C | 40.6 | 46.8 | 48.7 | 92.1 | 44.5 |
| Estradiol-beta              | F | -    | -    | -    | -    | -    |
|                             | C | n.q  | n.q  | n.q  | n.q  | n.q  |
| Estrone                     | F | -    | -    | -    | -    | -    |
|                             | C | n.q  | n.q  | n.q  | 7.55 | 2.8  |
| Ethinylestradiol            | F | -    | -    | -    | -    | -    |
|                             | C | n.q  | n.q  | n.q  | n.q  | n.q  |
| Carbamazepine               | F | 264  | 123  | 66   | 84   | 59   |
|                             | C | 24.6 | 15.7 | 13   | 32.2 | 22.5 |
| Carbamazepine-10,11-epoxide | F | -    | -    | -    | -    | -    |
|                             | C | n.q  | n.q  | n.q  | n.q  | n.q  |
| Clarithromycin              | F | 825  | 426  | 237  | 367  | 214  |
|                             | C | 77   | 54.5 | 46.9 | 140  | 81.6 |
| Cyclophosphamide            | F | -    | -    | -    | -    | -    |
|                             | C | n.q  | n.q  | n.q  | n.q  | n.q  |
| Diclofenac                  | F | 340  | 257  | 142  | 131  | 43   |
|                             | C | 31.7 | 32.9 | 28   | 50   | 16.6 |
| Erythromycin                | F | -    | -    | -    | -    | -    |
|                             | C | n.q  | n.q  | n.q  | n.q  | n.q  |
| Ibuprofen                   | F | 287  | 138  | 174  | 255  | 148  |
|                             | C | 26.8 | 17.6 | 34.5 | 97.3 | 56.7 |
| Ketoprofen                  | F | 83   | 13   | 19   | 49   | 15   |
|                             | C | 7.71 | 1.63 | 3.79 | 18.7 | 5.69 |
| Lidocaine                   | F | 268  | 315  | 194  | -    | -    |
|                             | C | 25   | 40.3 | 38.3 | n.q  | n.q  |
| Naproxen                    | F | 216  | 136  | 53   | 118  | 55   |
|                             | C | 20.2 | 17.4 | 10.4 | 45   | 21.1 |
| Sulfadimethoxine            | F | -    | -    | -    | -    | -    |
|                             | C | n.q  | n.q  | n.q  | n.q  | n.q  |
| Sulfadimidine               | F | -    | -    | -    | -    | -    |
|                             | C | n.q  | n.q  | n.q  | n.q  | n.q  |
| Sulfamethoxazole            | F | 168  | 80   | 69   | 61   | 37   |
|                             | C | 15.7 | 10.2 | 13.7 | 23.2 | 14.2 |
| Sulfathiazole               | F | -    | -    | -    | -    | -    |
|                             | C | n.q  | n.q  | n.q  | n.q  | n.q  |
| Triclosan                   | F | 903  | -    | -    | 157  | 186  |
|                             | C | 84.3 | n.q  | n.q  | 59.8 | 71.2 |
| PFOA                        | F | 77   | 112  | 79   | -    | -    |
|                             | C | 7.19 | 14.3 | 15.7 | n.q  | n.q  |
| PFOS                        | F | 185  | 146  | 124  | 73   | 43   |
|                             | C | 17.3 | 18.7 | 24.6 | 27.8 | 16.5 |

| Compound                    | Value    | A3    | A2    | A1     | B2    | B1    |
|-----------------------------|----------|-------|-------|--------|-------|-------|
| October 2016                | Q (m³/s) | 21    | 10.8  | 6.46   | 9.28  | 9.28  |
| Bisphenol A                 | F        | 71    | 35    | 7      | 64    | 25    |
|                             | C        | 39.1  | 37.4  | 12.3   | 80.3  | 31.6  |
| Estradiol-beta              | F        | -     | -     | -      | -     | -     |
|                             | C        | n.q   | n.q   | n.q    | n.q   | n.q   |
| Estrone                     | F        | 7     | -     | -      | 5     | -     |
|                             | C        | 3.8   | n.q   | n.q    | 6.18  | n.q   |
| Ethinylestradiol            | F        | -     | -     | -      | -     | -     |
|                             | C        | n.q   | n.q   | n.q    | n.q   | n.q   |
| Carbamazepine               | F        | 58    | 16    | 10     | 55    | 30    |
|                             | C        | 31.96 | 17.1  | 17.4   | 68.92 | 37.2  |
| Carbamazepine-10,11-epoxide | F        | -     | -     | -      | -     | -     |
|                             | C        | n.q   | n.q   | n.q    | 3.1   | n.q   |
| Clarithromycin              | F        | 495   | 34    | 32     | 512   | 95    |
|                             | C        | 253   | 36.23 | 57.49  | 639   | 118.2 |
| Cyclophosphamide            | F        | -     | -     | -      | -     | -     |
|                             | C        | n.q   | n.q   | n.q    | n.q   | n.q   |
| Diclofenac                  | F        | 88    | -     | 7      | 104   | 19    |
|                             | C        | 48.5  | n.q   | 12.4   | 129   | 24.27 |
| Erythromycin                | F        | 847   | 717   | 148    | 734   | 494   |
|                             | C        | 467   | 768.8 | 264.37 | 914.9 | 615.7 |
| Ibuprofen                   | F        | 22    | 5     | 2      | 15    | 14    |
|                             | C        | 12.2  | 4.9   | 4.1    | 18.8  | 17.2  |
| Ketoprofen                  | F        | -     | -     | -      | 6     | -     |
|                             | C        | n.q   | n.q   | n.q    | 6.99  | n.q   |
| Lidocaine                   | F        | 46    | 12    | 19     | 38    | 5     |
|                             | C        | 25.4  | 12.4  | 33.4   | 47.8  | 6.7   |
| Naproxen                    | F        | -     | -     | -      | 11    | 11    |
|                             | C        | n.q   | n.q   | n.q    | 13.7  | 13.6  |
| Sulfadimethoxine            | F        | -     | -     | -      | -     | -     |
|                             | C        | n.q   | n.q   | n.q    | n.q   | n.q   |
| Sulfadimidine               | F        | -     | -     | -      | -     | -     |
|                             | C        | n.q   | n.q   | n.q    | n.q   | n.q   |
| Sulfamethoxazole            | F        | 33    | 6     | 3      | 26    | 6     |
|                             | C        | 18.1  | 5.9   | 5.58   | 32.2  | 7.92  |
| Sulfathiazole               | F        | -     | -     | -      | -     | -     |
|                             | C        | n.q   | n.q   | n.q    | n.q   | n.q   |
| Triclosan                   | F        | 22    | -     | 5      | 11    | 7     |
|                             | C        | 12.1  | n.q   | 8      | 13.1  | 8.4   |
| PFOA                        | F        | 9     | 4     | 3      | 2     | 2     |
|                             | C        | 5.2   | 4.47  | 5.8    | 3     | 2.1   |
| PFOS                        | F        | 47    | 19    | 19     | 16    | 16    |
|                             | C        | 26    | 20    | 34     | 20    | 20    |

Table S5. The concentrations (ng/L), mass fluxes F (g/day), flux  $F_{iWWTPt}$  (g/day) and flux  $F_{iWWTPt}$  per inhabitant (g/day.Inhabitant) of the quantified micropollutants upstream and downstream the WWTP during the three sampling periods. The sum represents the sum of the mass fluxes for all the micropollutants upstream WWTP and from WWTP, and the percentages are calculated with respect to the total sum downstream WWTP. The letter F refers to mass flux and C to concentration. A dash '-' is used when  $C_{it}$  at the site is < LOQ.

|                  | September 2015       |                   |                                           |     |      | January 2016         |                   |                                           |      |     | October 2016         |                   |                                           |     |     |       |
|------------------|----------------------|-------------------|-------------------------------------------|-----|------|----------------------|-------------------|-------------------------------------------|------|-----|----------------------|-------------------|-------------------------------------------|-----|-----|-------|
|                  | Site                 |                   | FiWWTPt per inhabitant × 10 <sup>-5</sup> |     |      | Site                 |                   | FiWWTPt per inhabitant × 10 <sup>-5</sup> |      |     | Site                 |                   | FiWWTPt per inhabitant × 10 <sup>-5</sup> |     |     |       |
|                  | Upstream of the WWTP | Downstream of the | Value                                     | C   | F    | Upstream of the WWTP | Downstream of the | Value                                     | C    | F   | Upstream of the WWTP | Downstream of the | Value                                     | C   | F   |       |
|                  |                      |                   |                                           |     |      |                      |                   |                                           |      |     |                      |                   |                                           |     |     |       |
|                  |                      |                   |                                           |     |      |                      |                   |                                           |      |     |                      |                   |                                           |     |     |       |
| C                | F                    | C                 | F                                         | C   | F    | C                    | F                 | C                                         | F    | C   | F                    | C                 | F                                         | C   | F   |       |
| Carbamazepine    | 21.8                 | 15                | 54.1                                      | 38  | 23   | 8.9                  | 23                | 84                                        | 9.7  | 25  | 37.2                 | 30                | 68.9                                      | 55  | 25  | 9.7   |
| Clarithromycin   | 27.2                 | 19                | 148.4                                     | 103 | 84   | 32.6                 | 84                | 367                                       | 59.4 | 153 | 118.2                | 95                | 639                                       | 512 | 417 | 161.9 |
| Diclofenac       | 6.9                  | 5                 | 87.4                                      | 61  | 56   | 21.7                 | 56                | 131                                       | 34.1 | 88  | 24.3                 | 19                | 129                                       | 104 | 85  | 33    |
| Ibuprofen        | 8.2                  | 6                 | 9.3                                       | 7   | 1    | 0.3                  | 1                 | 255                                       | 41.5 | 107 | 17.2                 | 14                | 18.9                                      | 15  | 1   | 0.3   |
| Ketoprofen       | -                    | -                 | 16.9                                      | 12  | 12   | 4.6                  | 12                | 49                                        | 13.2 | 34  | -                    | -                 | 7                                         | 6   | 6   | 2.3   |
| Lidocaine        | 18.3                 | 13                | 57.2                                      | 40  | 27   | 10.4                 | 27                | -                                         | -    | -   | 6.7                  | 5                 | 47.8                                      | 38  | 33  | 12.8  |
| Naproxen         | 15.2                 | 11                | 29.6                                      | 21  | 10   | 3.8                  | 10                | 118                                       | 24.4 | 63  | 13.6                 | 11                | 13.7                                      | 11  | 0   | 0     |
| Sulfamethoxazole | 15.9                 | 11                | 64.6                                      | 45  | 34   | 13.2                 | 34                | 61                                        | 9.3  | 24  | 7.9                  | 6                 | 32.3                                      | 26  | 20  | 7.7   |
| Bisphenol A      | 69.1                 | 48                | 236.2                                     | 165 | 117  | 45.4                 | 117               | 241                                       | 48.1 | 124 | 31.6                 | 25                | 80.3                                      | 64  | 39  | 15.1  |
| Estrone          | -                    | -                 | -                                         | -   | -    | -                    | -                 | 20                                        | 5    | 13  | -                    | -                 | 6.2                                       | 5   | 5   | 1.9   |
| PFOS             | 12.3                 | 9                 | 14.2                                      | 10  | 1    | 0.38                 | 1                 | 73                                        | 11.6 | 30  | 20.1                 | 16                | 20.1                                      | 16  | 0   | 0     |
| Sum in %         | 27 %                 |                   | 73 %                                      |     | 53 % |                      | 47 %              |                                           | 26 % |     | 74 %                 |                   |                                           |     |     |       |

Table S6. Concentration of micropollutants in A1 on January and October.

| Micropollutant Concentration (ng/L) | January | October |
|-------------------------------------|---------|---------|
| Bisphenol A                         | 48.7    | 12.3    |
| Estradiol-beta                      | n.q     | n.q     |
| Estrone                             | n.q     | n.q     |
| Ethinylestradiol                    | n.q     | n.q     |
| Carbamazepine                       | 13.0    | 17.4    |
| Carbamazepine-10,11-epoxide         | n.q     | n.q     |
| Clarithromycin                      | 46.9    | 57.49   |
| Cyclophosphamide                    | n.q     | n.q     |
| Diclofenac                          | 28.0    | 12.4    |
| Erythromycin                        | n.q     | 264.37  |
| Ibuprofen                           | 34.5    | 4.1     |
| Ketoprofen                          | 3.79    | n.q     |
| Lidocaine                           | 38.3    | 33.4    |
| Naproxen                            | 10.4    | n.q     |
| Sulfadimethoxine                    | n.q     | n.q     |
| Sulfadimidine                       | n.q     | n.q     |
| Sulfamethoxazole                    | 13.7    | 5.58    |
| Sulfathiazole                       | n.q     | n.q     |
| Triclosan                           | n.q     | 8.0     |
| PFOA                                | 15.7    | 5.8     |
| PFOS                                | 24.6    | 34      |

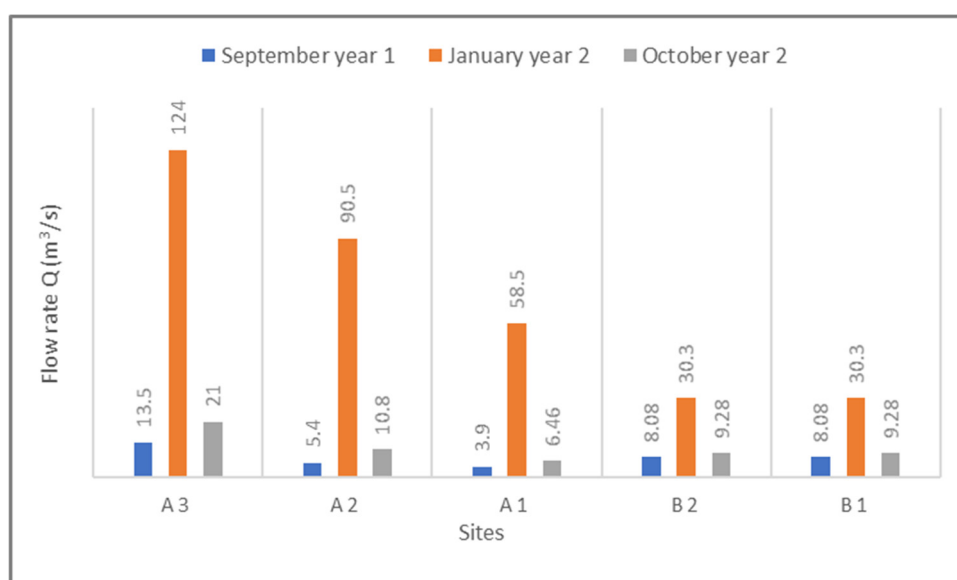

Figure S1. The variation of the flow rate during the three sampling periods at the five sampling sites.
